# Supplementary material for: In Vitro Benznidazole and Nifurtimox Susceptibility Profile of <em>Trypanosoma cruzi</em> Strains Belonging to Discrete Typing Units TcI, TcII and TcV
Source: Preprints.org preprint supplement (doi:10.20944/preprints201910.0166.v1), 2019-10-15

# Epimastigote

# Trypomastigote

# Amastigote

A

## Analysis results

Cutoff Finder analysis of "TCruzIECOFF" using R version 2.15.0 (2012-03-30).

21 patient data sets loaded.  
21 data sets with biomarker measurements.  
0 data sets with outcome information.  
0 data sets with survival information.

Optimal cutoff value using method "distribution": 2.689

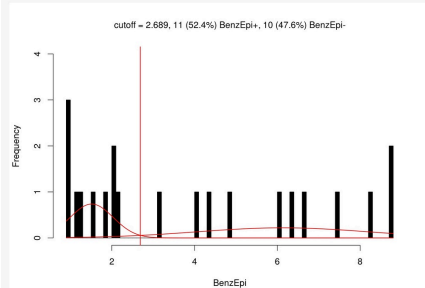

## Analysis results

Cutoff Finder analysis of "TCruzIECOFF" using R version 2.15.0 (2012-03-30).

21 patient data sets loaded.  
21 data sets with biomarker measurements.  
0 data sets with outcome information.  
0 data sets with survival information.

Optimal cutoff value using method "distribution": 4.016

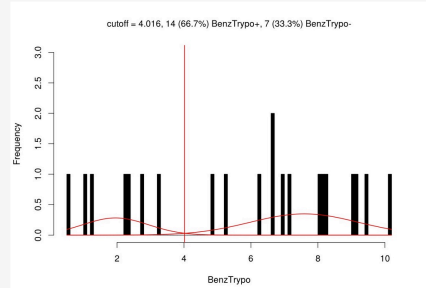

## Analysis results

Cutoff Finder analysis of "TCruzIECOFF" using R version 2.15.0 (2012-03-30).

21 patient data sets loaded.  
21 data sets with biomarker measurements.  
0 data sets with outcome information.  
0 data sets with survival information.

Optimal cutoff value using method "distribution": 2.677

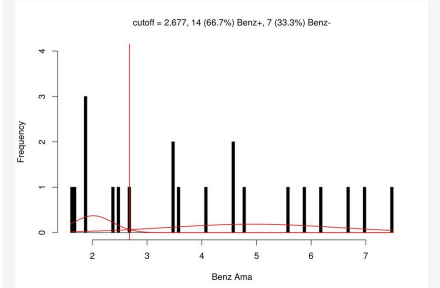

B

## Analysis results

Cutoff Finder analysis of "TCruzIECOFF" using R version 2.15.0 (2012-03-30).

21 patient data sets loaded.  
21 data sets with biomarker measurements.  
0 data sets with outcome information.  
0 data sets with survival information.

Optimal cutoff value using method "distribution": 1.089

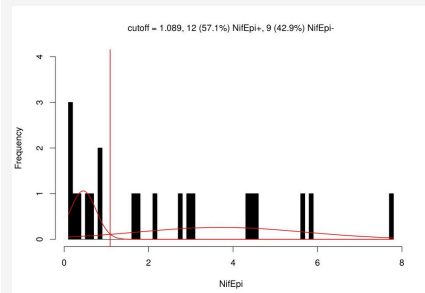

## Analysis results

Cutoff Finder analysis of "TCruzIECOFF" using R version 2.15.0 (2012-03-30).

21 patient data sets loaded.  
21 data sets with biomarker measurements.  
0 data sets with outcome information.  
0 data sets with survival information.

Optimal cutoff value using method "distribution": 3.238

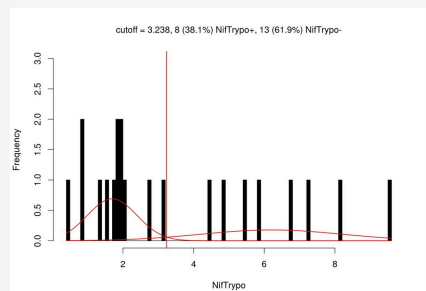

## Analysis results

Cutoff Finder analysis of "TCruzIECOFF" using R version 2.15.0 (2012-03-30).

21 patient data sets loaded.  
21 data sets with biomarker measurements.  
0 data sets with outcome information.  
0 data sets with survival information.

Optimal cutoff value using method "distribution": 2.123

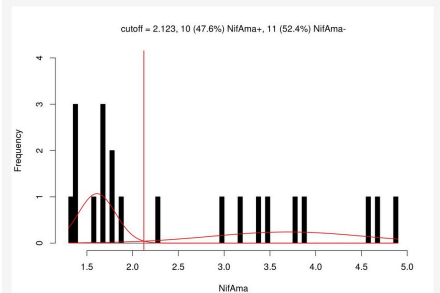

Supplement: Supplementary file 1 [file Supple data 2.pdf › supp data/Supple data 2.pdf]
