# Supplementary figures and images for: In Vitro Benznidazole and Nifurtimox Susceptibility Profile of <em>Trypanosoma cruzi</em> Strains Belonging to Discrete Typing Units TcI, TcII and TcV
Source: Preprints.org preprint supplement (doi:10.20944/preprints201910.0166.v1), 2019-10-15

# Benznidazole

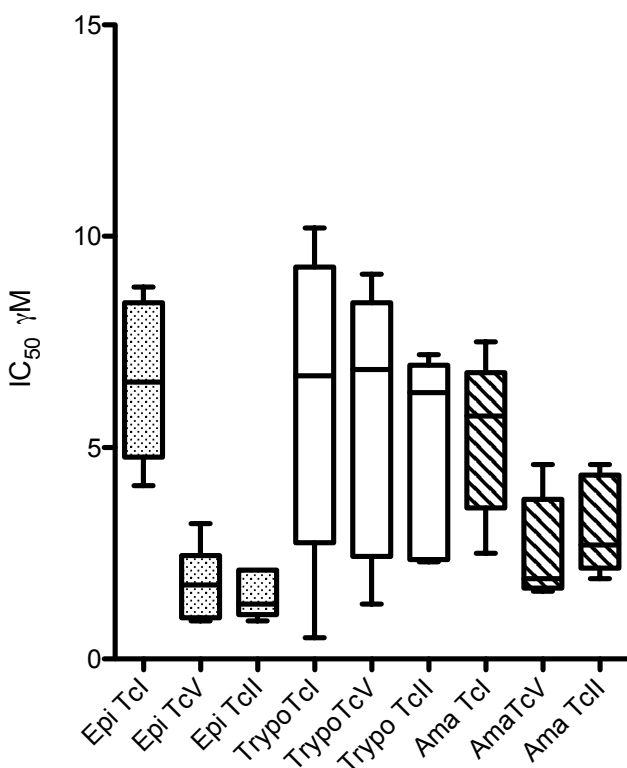

# Nifurtimox

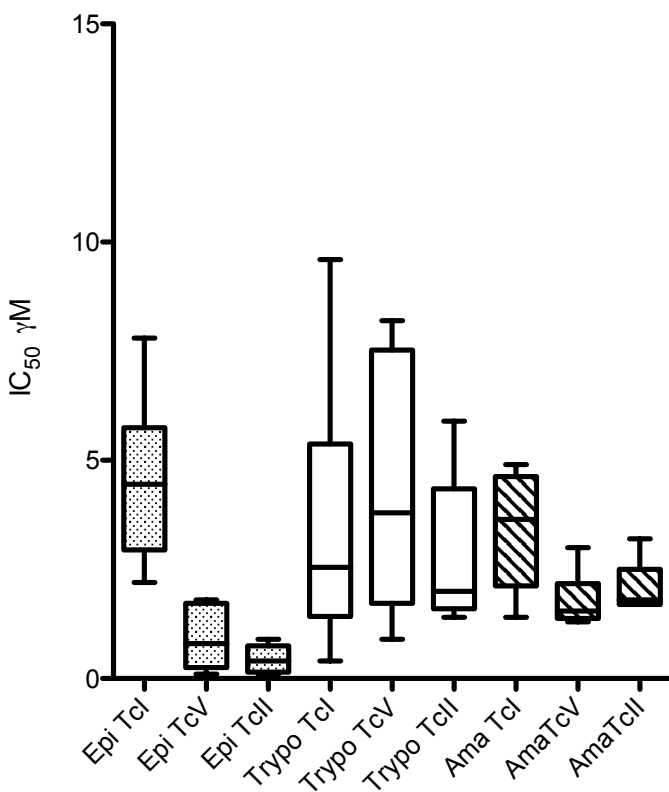

Supplement: Supplementary file 2 [file Supple data1.pdf › supp data/Supple data1.pdf]
